# Supplementary material for: Size-selected boron nitride nanosheets as oxygen-atom corrosion resistant fillers
Source: Royal Society of Chemistry journal article supplement (doi:10.1039/c4ra09156f), 2014-12-04
Supplement: c4ra09156f1.pdf [file c4ra09156f1.pdf]

## Electronic Supplementary Information (ESI)

### Size-selected boron nitride nanosheets as oxygen-atom corrosion resistant fillers

Min Yi,<sup>\*ab</sup> Zhigang Shen,<sup>\*a</sup> Lei Liu,<sup>a</sup> and Shuaishuai Liang<sup>a</sup>

<sup>a</sup> Beijing Key Laboratory for Powder Technology Research and Development, Beijing University of Aeronautics and Astronautics (Beihang University, BUAA), Beijing 100191, China.

<sup>b</sup> Institute of Materials Science, Technische Universität Darmstadt, Darmstadt 64287, Germany.

*E-mail:* [yimin@buaa.edu.cn](mailto:yimin@buaa.edu.cn); [shenzhg@buaa.edu.cn](mailto:shenzhg@buaa.edu.cn)

## Experimental

1.8 g PVA (polyvinylalcohol, Beijing Yili Fine Chemicals Co., Ltd.,  $M_w=77000\pm 2200$  g/mol) was dissolved in 60 mL water ( $\sim 90$  °C) and magnetically stirred for 8 h to form homogeneous solution with a PVA concentration of 30 mg/mL. Then 0.6 g crystal BN powder (Alfa Aesar,  $\leq 300$  mesh) were added into the PVA solution and sonicated for 8 h in a tip sonic bath (50% of 650W, 3s on, 3s off) with ice cooling. The sonicated dispersions were further centrifuged at 3000rpm ( $\times 2304$ ) for 45 min. The top 90% supernatant was collected for further characterization and use. The BNNSs concentration was estimated as  $\sim 0.22$  mg/mL by TGA analysis of the PVA/BNNSs powder, as the TGA curve shown in Figure S1. The resultant dispersions were expected to contain small BNNSs. These dispersions were then mixed with PVA solution (30 mg/mL) to give a range of composite dispersions with different mass fraction of BNNSs.

After the centrifugation at 3000rpm ( $\times 2304g$ ), the sediment was expected to contain medium BNNSs and unexfoliated thick BN flakes. So 40 mL PVA solution (30 mg/mL) was added to dissolve the sediment, followed by sonication for another 2 h by a mild bath sonicator (100 W, 40 KHz) with water cooling. Then 1500rpm ( $\times 576g$ ) was used to centrifuge this dispersion and the supernatant was collected. By the method mentioned above, the BNNSs concentration of this dispersion was estimated as  $\sim 0.94$  mg/mL by TGA analysis of the PVA/BNNSs powder, as the TGA curve shown in Figure S1. The resultant dispersions were expected to contain medium

BNNSs. These dispersions were also then mixed with PVA solution (30 mg/mL) to give a range of composite dispersions with different mass fraction of BNNSs.

After the centrifugation at 1500rpm ( $\times 576g$ ), the sediment was expected to contain large BNNSs and unexfoliated thick BN flakes. So 30 mL PVA solution (30 mg/mL) was added to dissolve the sediment, followed by sonication for another 1 h by a mild bath sonicator (100 W, 40 KHz) with water cooling. Then 500rpm ( $\times 64g$ ) was used to centrifuge this dispersion and the supernatant was collected. By the method mentioned above, the BNNSs concentration of this dispersion was estimated as  $\sim 2.8$  mg/mL by TGA analysis of the PVA/BNNSs powder, as the TGA curve shown in Figure S1. These dispersions were also then mixed with PVA solution (30 mg/mL) to give a range of composite dispersions with different mass fraction of BNNSs.

The above composite dispersions were further formed into films for oxygen-atom corrosion test. To form films, after sonication for 20 min, these dispersions were drop cast into high density polyethylene trays and left for 24 h in a vacuum oven at 60°C with a pressure of 0.9 bar. Composite films were peeled off and cut into  $10 \times 10$  mm<sup>2</sup> samples using a die cutter. These films are measured as  $\sim 110$   $\mu\text{m}$  by micrometer (micrometer screw gauge).

Oxygen-atom exposure experiments were carried out in low earth orbit (LEO) environment ground-based atomic oxygen effect simulation facility in Beijing University of Aeronautics and Astronautics,<sup>1</sup> under a condition of pressure of 0.15 Pa, filament discharge voltage of 120 V, and filament discharge current of 140 mA. The

oxygen atom is generated by a plasma-type ground-based atomic oxygen effects simulation facility designed by ourselves (*J. Phys. D: Appl. Phys.* 2001,34,2308; *Acta Aeronautica Et Astronautica Sinica* 2000,21,425). This facility is with the filament discharge and bound of magnetic field. The temperature in the test is low, less than 50 °C. The mass loss of Kapton in the atomic oxygen exposure experiments was used as a criterion to calculate the atomic oxygen flux. The calculation formula is  $Ft = \Delta M / (\rho A E_y)$  in which  $F$  is the effective flow rate of atomic oxygen onto the sample surface and  $\Delta M$ ,  $\rho$ ,  $A$ ,  $t$ ,  $E_y$  are mass loss, density, surface area, exposure time, and erosion yield, respectively.  $Ft$  is the accumulative atomic oxygen flux exerting on the sample surface. For Kapton,  $E_y$  is equal to  $\sim 3.0 \times 10^{-24} \text{cm}^3/\text{atom}$ . In this study, the accumulative atomic oxygen flux was about  $4.7 \times 10^{20} \text{atoms/cm}^2$ , which was approximately equivalent to the accumulative atomic oxygen flux of  $\sim 140$  days at an orbit of 300 km in LEO.<sup>2</sup> For each mass fraction of PVA/BNNSs composite films, at least three samples were tested and the mass loss averaged.

Scanning electron microscopy (SEM) images were collected by a LEO 1530VP. Atomic force microscopy (AFM) images were captured with a Multimode 8 AFM (Bruker) in ScanAsyst Air mode. Thermogravimetric (TGA) analysis was performed on a TGA/SDTA851 (Mettler Toledo, USA) at 10°C/min in a nitrogen atmosphere. The mass of samples before and after oxygen-atom exposure was measured using a DT-100 balance with a sensitivity of 0.05 mg. X-ray photoelectron spectroscopy (XPS) was obtained by an ESCALAB-250 spectrometer.

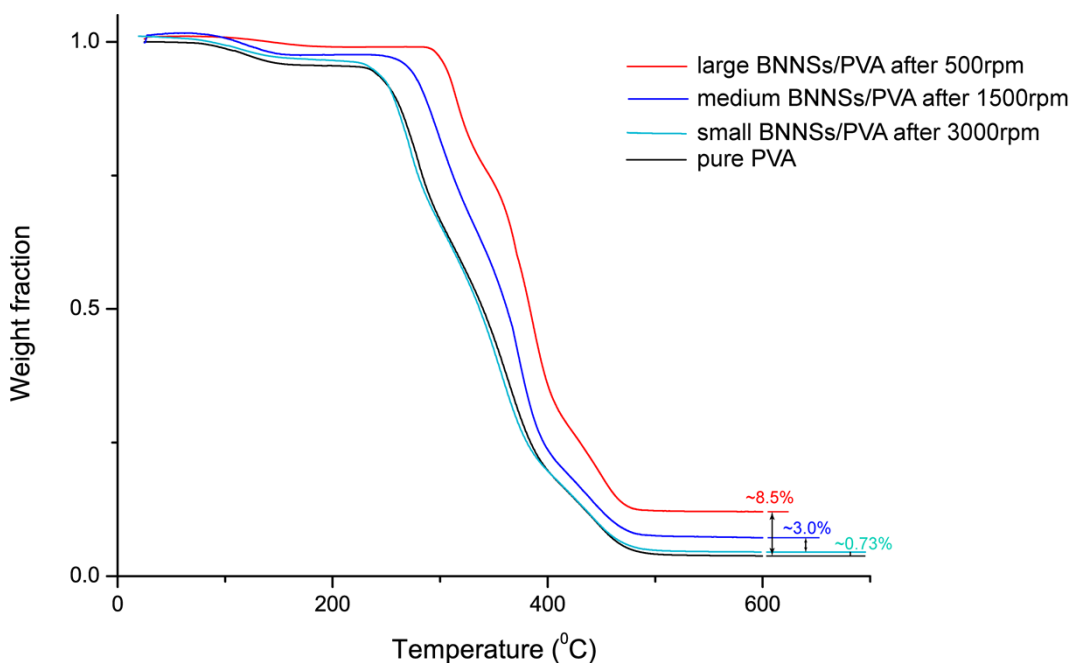

**Fig. S1** TGA curves pure PVA and PVA/BNNSs composite powder. The TGA curves of the composites are shifted toward a higher temperature when compared to that of pure PVA, showing the enhancement in thermal stability.

## References

1. Yi, M.; Zhang, W.; Shen, Z.; Zhang, X.; Zhao, X.; Zheng, Y.; Ma, S., Controllable functionalization and wettability transition of graphene-based films by an atomic oxygen strategy. *J. Nanopart. Res.* 2013, 15, 1811.
2. Gouzman, I.; Girshevitz, O.; Grossman, E.; Eliaz, N.; Sukenik, C. N., Thin Film Oxide Barrier Layers: Protection of Kapton from Space Environment by Liquid Phase Deposition of Titanium Oxide. *ACS Appl. Mater. Interfaces* 2010, 2 (7), 1835-1843.
